# Supplementary material for: Anti-Obesity and Anti-Diabetic Effects of Ostericum koreanum (Ganghwal) Extract
Source: MDPI journal article supplement (doi:10.3390/ijms25094908), 2024-04-30
Supplement: s1 [file s1]

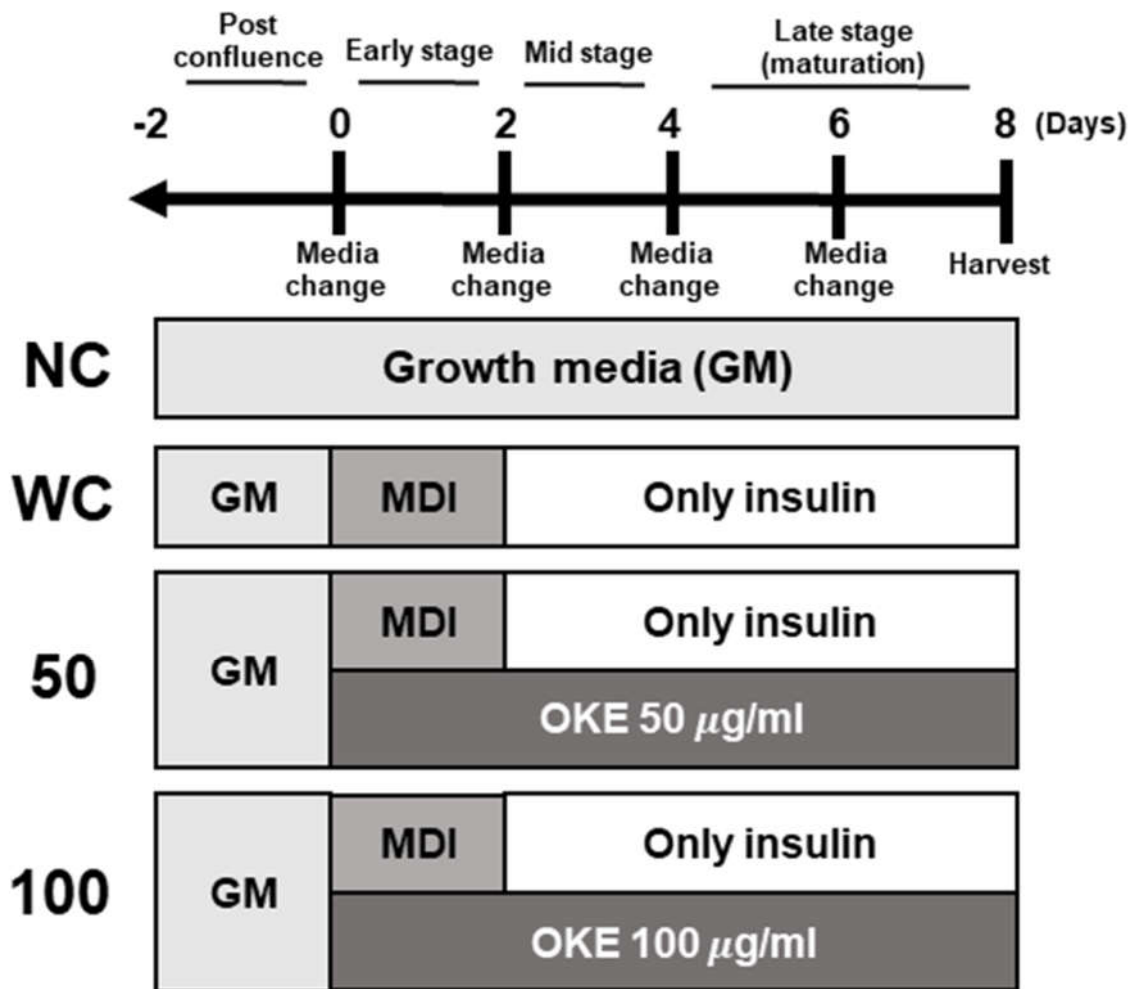

**Supplementary Figure S1.** Scheme for adipogenic differentiation of 3T3-L1 preadipocytes.

Differentiation was carried out over a total of 8 days according to the scheme, and four groups (NC; non-differentiated cell, WC; white adipocytes, 50; white adipocytes treated with 50  $\mu\text{g/mL}$  OKE, 100; white adipocytes treated with 100  $\mu\text{g/mL}$ ) were divided according to the presence or absence of MDI and OKE.

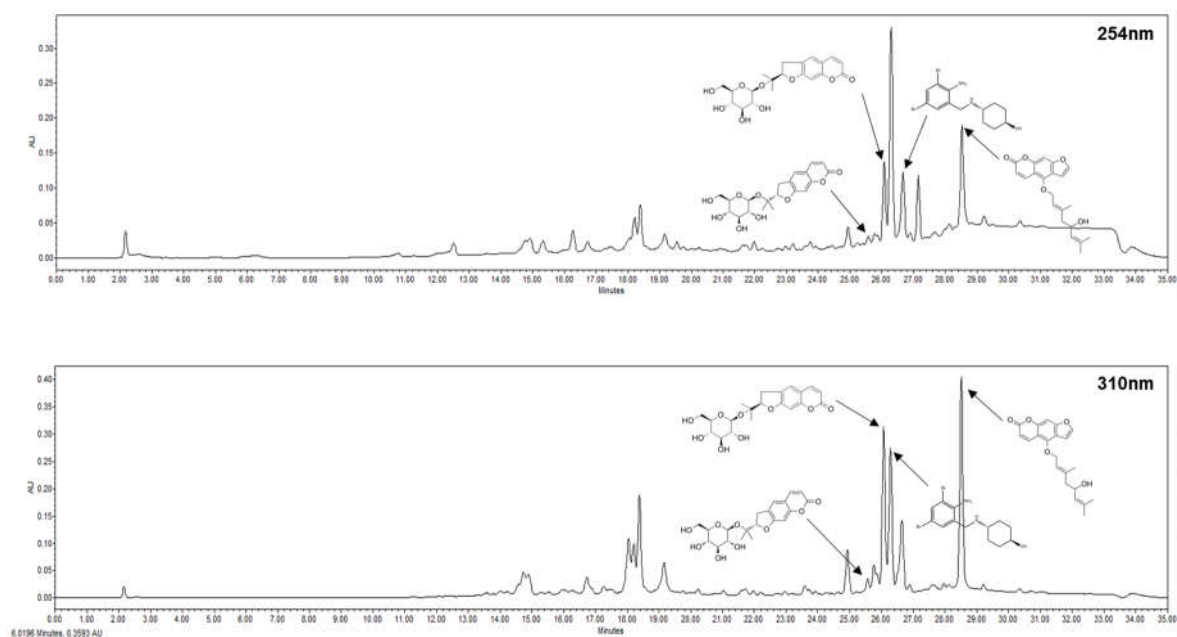

| Compound   | Formula                                                          | MW (m/z) | RT (min) | Absorbance (nm) | Ionization         | Compound Nature | Ref  |
|------------|------------------------------------------------------------------|----------|----------|-----------------|--------------------|-----------------|------|
| Marmesinin | C <sub>20</sub> H <sub>24</sub> O <sub>9</sub>                   | 408.12   | 25.566   | 254, 310        | [M+H] <sup>+</sup> | Psoralen        | [26] |
| Nodakenin  | C <sub>20</sub> H <sub>24</sub> O <sub>9</sub>                   | 408.04   | 26.070   | 254, 310        | [M+H] <sup>+</sup> | Furanocoumarin  | [23] |
| Ambroxol   | C <sub>13</sub> H <sub>18</sub> Br <sub>2</sub> N <sub>2</sub> O | 377.02   | 26.287   | 254, 310        | [M+H] <sup>+</sup> | Amoratic amine  | [27] |
| Notopterol | C <sub>21</sub> H <sub>22</sub> O <sub>5</sub>                   | 354.44   | 28.511   | 254, 310        | [M+H] <sup>+</sup> | Furanocoumarin  | [28] |

**Supplementary Figure S2.** Tentative identification of components contained in OKE

Ion chromatography of OKE in positive mode by LC-MS analysis and profiling of the tentative components.

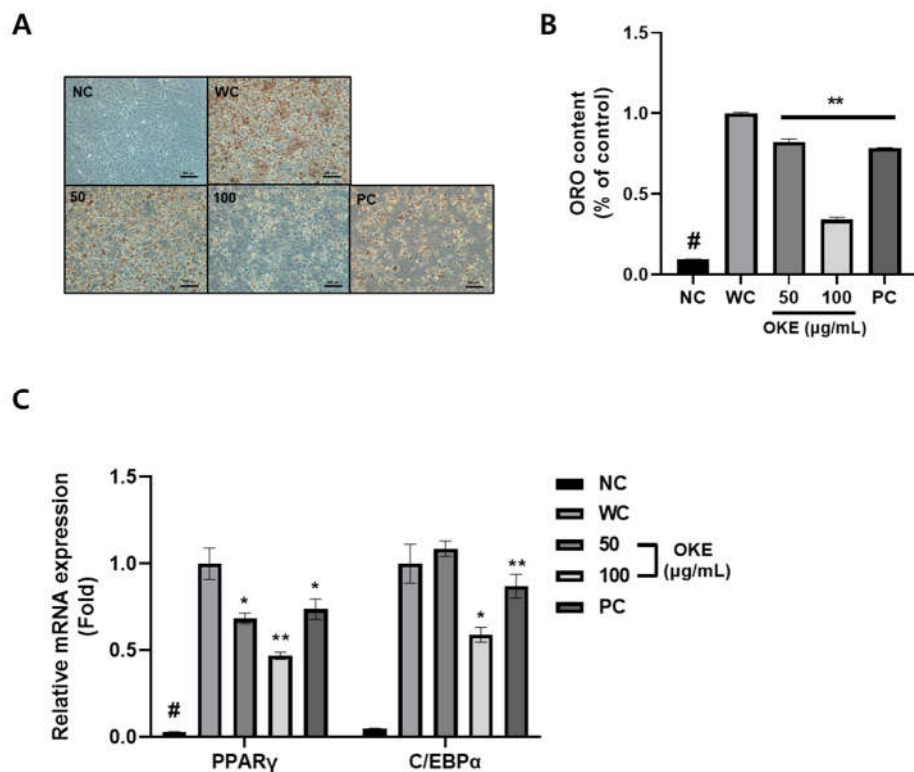

**Supplementary Figure S3.** comparison of inhibition of adipogenic differentiation and lipid accumulation between OKE and the positive control (PC).

(A, B) To compare the effects of OKE and PC (Green tea extract at 100  $\mu\text{g/mL}$ ) on inhibiting adipogenic differentiation and lipid accumulation, mature adipocytes were stained using Oil-red O staining, and Oil-red O products were dissolved in isopropanol and quantified at 450 nm using a microplate reader. (C) To compare the inhibitory effects of OKE and PC on adipogenic differentiation transcription factors, the mRNA expression of Ppar $\gamma$  and C/ebp $\alpha$  in 3T3-L1 adipocytes was determined by real-time reverse transcription polymerase chain reaction (RT-PCR). The expression of all factors was normalized to the expression level of  $\beta$ -actin. All experiments were performed in three biologically and technically independent replicates. The data are expressed as the mean  $\pm$  standard deviation. \*  $p < 0.05$  compared with the WC group; \*\*  $p < 0.01$  compared with the WC group. #  $p < 0.01$  when compared with the NC group.

**Supplementary Table S1.** primer sequences used in RT-PCR.

| Gene name                       | Accession No.  | Sequence |                                 |
|---------------------------------|----------------|----------|---------------------------------|
| <i>Ap2</i>                      | NM_001409513.1 | Forward  | 5'-AAGGTGAAGAGCATAACCCT-3'      |
|                                 |                | Reverse  | 3'-TCACGCCTTTCATAACACATTCC-5'   |
| <i>C/ebp<math>\alpha</math></i> | NM_001287523   | Forward  | 5'-TTACAACAGGCCAGGTTTCC-3'      |
|                                 |                | Reverse  | 3'-GGCTGGCGACATACAGATCA-5'      |
| <i>Ppary</i>                    | AB644275       | Forward  | 5'-TTTTCAAGGGTGCCAGTTTC-3'      |
|                                 |                | Reverse  | 3'-AATCCTTGGCCCTCTGAGAT-5'      |
| <i><math>\beta</math>-actin</i> | EF095208       | Forward  | 5'-GACAACGGCTCCGGCATGTGCAAAG-3' |
|                                 |                | Reverse  | 3'-TTCACGGTTGGCCTTAGGGTTCAG-5'  |

**Supplementary Table S2.** information on antibodies used in Western blot.

| Gene name               | Company | Product No. | IgG | Conc.  |
|-------------------------|---------|-------------|-----|--------|
| <b>Primary antibody</b> |         |             |     |        |
| PPAR $\gamma$           | SCBT    | sc-7273     | M   | 1:500  |
| C/EBP $\alpha$          | CST     | 2295S       | R   | 1:1000 |
| Adiponectin             | Abcam   | ab22554     | M   | 1:1000 |
| pAMPK                   | CST     | 2531S       | R   | 1:1000 |
| AMPK                    | CST     | 2532S       | R   | 1:1000 |
| GLUT4                   | CST     | 2213S       | M   | 1:1000 |
| $\beta$ -actin          | SCBT    | sc-47778    | M   | 1:500  |
| <b>Second antibody</b>  |         |             |     |        |
| Mouse                   | CST     | 7076S       |     | 1:2000 |
| Rabbit                  | CST     | 7074S       |     | 1:3000 |
